# Supplementary material for: Epigenomic Reprogramming of Adult Cardiomyocyte-Derived Cardiac Progenitor Cells
Source: PubMed Central journal article supplement (PMC4677315; doi:10.1038/srep17686), 2015-12-14
Supplement: srep17686-s1.pdf [file srep17686-s1.pdf]

## Supplementary Information

### Epigenomic Reprogramming of Adult Cardiomyocyte-Derived Cardiac Progenitor Cells

Yiqiang Zhang<sup>1,2§</sup>, Jiang F. Zhong<sup>3</sup>, Hongyu Qiu<sup>4</sup>, W. Robb MacLellan<sup>1</sup>, Eduardo Marbán<sup>2</sup>, Charles Wang<sup>5\*</sup>

<sup>1</sup>Division of Cardiology, Department of Medicine, and Center for Cardiovascular Biology, and Institute for Stem Cell and Regenerative Medicine, University of Washington, Seattle, WA 98109, USA. <sup>2</sup>The Heart Institute, Cedars-Sinai Medical Center, Los Angeles, CA, USA.

<sup>3</sup>Department of Pathology, University of Southern California, Los Angeles, CA 90033, USA.

<sup>4</sup>Department of Basic Sciences, School of Medicine, Loma Linda University, Loma Linda, CA 92350, USA. <sup>5</sup> Center for Genomics & Department of Basic Sciences, School of Medicine, Loma Linda University, Loma Linda, CA, USA.

§Co-corresponding author: YZ ([yzhang@cardiology.washington.edu](mailto:yzhang@cardiology.washington.edu))

\*Corresponding author: CW ([chwang@llu.edu](mailto:chwang@llu.edu))

Supplementary Information including:

4 Supplementary Tables, 10 Supplementary Figures, 1 IPA Analysis Report.

Additional information include: 10 Supplementary datasets (MS EXCEL, separated files).

Microarray data can be accessed on the GEO database with accession number GSE49683.

## Supplementary Tables

**Supplementary Table S1. Cardiac function-, ion channel-, and myofilament structure-related significant genes passed GOEA.** Note: For genes with multiple probe sets, the data of maximal Fold Changes (mCPC vs Ctl) are listed.

| Gene Symbol     | Probeset ID  | p-value   | Fold-Change | Gene Title                                                                | GO Function                                       |
|-----------------|--------------|-----------|-------------|---------------------------------------------------------------------------|---------------------------------------------------|
| <i>Abcc9</i>    | 1420408_a_at | 1.628E-07 | -72.5       | ATP-binding cassette, sub-family C (CFTR/MRP), member 9                   | cation channel activity                           |
| <i>Acadm</i>    | 1415984_at   | 8.057E-05 | -52.5       | acyl-Coenzyme A dehydrogenase, medium chain                               | cardiac muscle cell differentiation               |
| <i>Actc1</i>    | 1415927_at   | 8.242E-06 | -112.4      | actin, alpha, cardiac muscle 1                                            | cardiac muscle contraction                        |
| <i>Actn2</i>    | 1448327_at   | 3.007E-05 | -34.8       | actinin alpha 2                                                           | ion channel binding                               |
| <i>Adk</i>      | 1416319_at   | 3.867E-04 | -11.5       | adenosine kinase                                                          | positive regulation of cardiac muscle hypertrophy |
| <i>Akap6</i>    | 1440859_at   | 2.943E-04 | -15.4       | A kinase (PRKA) anchor protein 6                                          | regulation of cardiac muscle cell contraction     |
| <i>Ank2</i>     | 1434265_s_at | 7.025E-04 | -13.9       | ankyrin 2, brain                                                          | regulation of heart rate by cardiac conduction    |
| <i>Asph</i>     | 1425274_at   | 5.640E-04 | -7.5        | aspartate-beta-hydroxylase                                                | positive regulation of cation channel activity    |
| <i>Atp1a2</i>   | 1443823_s_at | 4.994E-06 | -9.4        | ATPase, Na <sup>+</sup> /K <sup>+</sup> transporting, alpha 2 polypeptide | regulation of cardiac muscle cell contraction     |
| <i>Cacnalc</i>  | 1421297_a_at | 4.424E-05 | -16.5       | calcium channel, voltage-dependent, L type, alpha 1C subunit              | cation channel activity                           |
| <i>Cacna2d1</i> | 1449999_a_at | 1.053E-04 | -10.1       | calcium channel, voltage-dependent, alpha2/delta subunit 1                | cation channel activity                           |

|                 |              |           |        |                                                              |                                                          |
|-----------------|--------------|-----------|--------|--------------------------------------------------------------|----------------------------------------------------------|
| <i>Cacnb2</i>   | 1456401_at   | 2.424E-04 | -3.9   | calcium channel, voltage-dependent, beta 2 subunit           | cation channel activity                                  |
| <i>Casq2</i>    | 1422529_s_at | 4.512E-05 | -51.2  | calsequestrin 2                                              | regulation of cardiac muscle cell contraction            |
| <i>Clic5</i>    | 1456873_at   | 2.073E-05 | -34.6  | chloride intracellular channel 5                             | voltage-gated anion channel activity                     |
| <i>Csrp3</i>    | 1460318_at   | 1.464E-05 | -36.8  | cysteine and glycine-rich protein 3                          | cardiac muscle contraction                               |
| <i>Dmd</i>      | 1417307_at   | 7.182E-04 | -20.5  | dystrophin, muscular dystrophy                               | regulation of cation channel activity                    |
| <i>Dsc2</i>     | 1426911_at   | 8.223E-05 | -21.4  | desmocollin 2                                                | regulation of heart rate by cardiac conduction           |
| <i>Dsg2</i>     | 1426153_a_at | 2.562E-04 | -20.5  | desmoglein 2                                                 | regulation of heart rate by cardiac conduction           |
| <i>Dsp</i>      | 1435494_s_at | 8.405E-07 | -172.1 | desmoplakin                                                  | regulation of heart rate by cardiac conduction           |
| <i>Fgf1</i>     | 1450869_at   | 8.131E-04 | -9.2   | fibroblast growth factor 1                                   | cardiac muscle cell proliferation                        |
| <i>Fgf13</i>    | 1418497_at   | 1.235E-04 | -12.7  | fibroblast growth factor 13                                  | ion channel binding                                      |
| <i>Fhod3</i>    | 1435551_at   | 8.651E-05 | -17.0  | formin homology 2 domain containing 3                        | cardiac myofibril assembly                               |
| <i>Hsp90aa1</i> | 1437497_a_at | 5.360E-04 | 5.8    | heat shock protein 90, alpha (cytosolic), class A member 1   | ion channel binding                                      |
| <i>Kcnj3</i>    | 1455374_at   | 1.671E-04 | -18.0  | potassium inwardly-rectifying channel, subfamily J, member 3 | cation channel activity                                  |
| <i>Kcnj5</i>    | 1441590_at   | 9.423E-05 | -18.1  | potassium inwardly-rectifying channel, subfamily J, member 5 | cation channel activity                                  |
| <i>Mef2c</i>    | 1421027_a_at | 3.611E-04 | -19.9  | myocyte enhancer factor 2C                                   | positive regulation of cardiac muscle cell proliferation |
| <i>Murc</i>     | 1420551_at   | 7.891E-05 | -9.8   | muscle-related coiled-coil protein                           | cardiac myofibril assembly                               |

|               |              |           |        |                                                        |                                                                             |
|---------------|--------------|-----------|--------|--------------------------------------------------------|-----------------------------------------------------------------------------|
| <i>Mybpc3</i> | 1418551_at   | 2.182E-05 | -20.6  | myosin binding protein C, cardiac                      | cardiac muscle contraction                                                  |
| <i>Myh6</i>   | 1448826_at   | 2.863E-05 | -170.2 | myosin, heavy polypeptide 6, cardiac muscle, alpha     | cardiac muscle cell development                                             |
| <i>Myh7</i>   | 1448553_at   | 6.507E-05 | -10.0  | myosin, heavy polypeptide 7, cardiac muscle, beta      | ventricular cardiac muscle tissue morphogenesis                             |
| <i>Myl2</i>   | 1448394_at   | 3.963E-05 | -107.1 | myosin, light polypeptide 2, regulatory, cardiac, slow | cardiac muscle contraction                                                  |
| <i>Myl3</i>   | 1427768_s_at | 9.240E-05 | -29.3  | myosin, light polypeptide 3                            | cardiac muscle contraction                                                  |
| <i>Mylk3</i>  | 1439101_at   | 1.033E-04 | -20.1  | myosin light chain kinase 3                            | cardiac myofibril assembly                                                  |
| <i>Myocd</i>  | 1425978_at   | 2.946E-04 | -15.0  | myocardin                                              | cell growth involved in cardiac muscle cell development                     |
| <i>Nexn</i>   | 1435649_at   | 2.471E-04 | -35.3  | nexilin                                                | cardiac muscle cell development                                             |
| <i>Phpt1</i>  | 1427903_at   | 2.574E-04 | -6.7   | phosphohistidine phosphatase 1                         | ion channel inhibitor activity                                              |
| <i>Pln</i>    | 1460332_at   | 1.636E-05 | -171.5 | phospholamban                                          | regulation of the force of heart contraction by cardiac conduction          |
| <i>Popdc2</i> | 1417806_at   | 7.431E-04 | -14.1  | popeye domain containing 2                             | cardiac pacemaker cell development                                          |
| <i>Prox1</i>  | 1437894_at   | 8.123E-04 | -10.1  | prospero-related homeobox 1                            | cardiac septum morphogenesis                                                |
| <i>Rgs2</i>   | 1419248_at   | 6.096E-05 | -22.9  | regulator of G-protein signaling 2                     | positive regulation of cardiac muscle contraction                           |
| <i>Ryr2</i>   | 1450123_at   | 3.973E-05 | -106.9 | ryanodine receptor 2, cardiac                          | positive regulation of ryanodine-sensitive calcium-release channel activity |
| <i>Sgcb</i>   | 1419668_at   | 1.464E-05 | -12.0  | sarcoglycan, beta (dystrophin-associated               | cardiac muscle cell development                                             |

|              |              |           |        |                                               |                                              |
|--------------|--------------|-----------|--------|-----------------------------------------------|----------------------------------------------|
|              |              |           |        | glycoprotein)                                 |                                              |
| <i>Sox4</i>  | 1455867_at   | 2.081E-04 | 3.8    | SRY-box containing gene 4                     | cardiac septum morphogenesis                 |
| <i>Tgfb3</i> | 1433795_at   | 1.208E-04 | -5.0   | transforming growth factor, beta receptor III | cardiac epithelial to mesenchymal transition |
| <i>Tnnc1</i> | 1418370_at   | 4.610E-05 | -20.0  | troponin C, cardiac/slow skeletal             | cardiac muscle contraction                   |
| <i>Tnni3</i> | 1422536_at   | 2.789E-05 | -130.7 | troponin I, cardiac 3                         | cardiac muscle contraction                   |
| <i>Tnnt2</i> | 1424967_x_at | 1.741E-04 | -85.1  | troponin T2, cardiac                          | myofilament                                  |
| <i>Trdn</i>  | 1451801_at   | 1.283E-06 | -37.8  | triadin                                       | cation channel complex                       |
| <i>Ttn</i>   | 1444083_at   | 6.915E-07 | -74.2  | titin                                         | cardiac muscle contraction                   |

**Supplementary Table S2. Cell cycle-related significant genes passed GOEA.** Note: For genes with multiple probe sets, the data of maximal Fold Changes (mCPC vs Ctl) are listed.

| Gene Symbol    | Probeset ID  | p-value  | Fold-Change | Gene Title                                                                              | GO Function                               |
|----------------|--------------|----------|-------------|-----------------------------------------------------------------------------------------|-------------------------------------------|
| <i>Ank3</i>    | 1451628_a_at | 4.57E-05 | -5.6        | ankyrin 3, epithelial                                                                   | cell cycle process                        |
| <i>Anxa1</i>   | 1448213_at   | 2.86E-05 | 47.7        | annexin A1                                                                              | positive regulation of cell cycle process |
| <i>Appl2</i>   | 1426743_at   | 3.12E-05 | -6.4        | adaptor protein, phosphotyrosine interaction, PH domain and leucine zipper containing 2 | cell cycle                                |
| <i>Ccnd2</i>   | 1430127_a_at | 0.001452 | 5.5         | cyclin D2                                                                               | cell cycle                                |
| <i>Ccnl2</i>   | 1432195_s_at | 0.000576 | -2.2        | cyclin L2                                                                               | regulation of cell cycle                  |
| <i>Cdk4</i>    | 1422439_a_at | 0.039159 | 8.0         | cyclin-dependent kinase 4                                                               | regulation of cell cycle                  |
| <i>Cdkn1a</i>  | 1424638_at   | 3.29E-06 | 28.6        | cyclin-dependent kinase inhibitor 1A (P21)                                              | positive regulation of cell cycle process |
| <i>Cdkn1b</i>  | 1434045_at   | 0.000706 | -3.0        | cyclin-dependent kinase inhibitor 1B                                                    | G1/S transition of mitotic cell cycle     |
| <i>Cfl1</i>    | 1455138_x_at | 0.000323 | 7.9         | cofilin 1, non-muscle                                                                   | cell cycle process                        |
| <i>Cks2</i>    | 1417457_at   | 0.000414 | 47.8        | CDC28 protein kinase regulatory subunit 2                                               | cell cycle                                |
| <i>Clasp2</i>  | 1456911_at   | 0.000379 | -2.7        | CLIP associating protein 2                                                              | cell cycle                                |
| <i>Csnk1d</i>  | 1418889_a_at | 0.000543 | 6.8         | casein kinase 1, delta                                                                  | cell cycle process                        |
| <i>Cul3</i>    | 1434717_at   | 0.000267 | -5.3        | cullin 3                                                                                | positive regulation of cell cycle process |
| <i>Ddit3</i>   | 1443897_at   | 0.000258 | -14.0       | DNA-damage inducible transcript 3                                                       | cell cycle arrest                         |
| <i>Ereg</i>    | 1419431_at   | 4.90E-05 | 37.7        | epiregulin                                                                              | positive regulation of cell cycle process |
| <i>Esr1</i>    | 1421244_at   | 0.000176 | -75.3       | estrogen receptor 1 (alpha)                                                             | regulation of mitotic cell cycle          |
| <i>Fbxw7</i>   | 1451558_at   | 0.000139 | -8.9        | F-box and WD-40 domain protein 7                                                        | regulation of cell cycle                  |
| <i>Fosl1</i>   | 1417487_at   | 1.84E-05 | 39.4        | fos-like antigen 1                                                                      | regulation of cell cycle                  |
| <i>Gadd45b</i> | 1450971_at   | 0.000319 | 21.3        | growth arrest and DNA-damage-inducible 45 beta                                          | regulation of cell cycle                  |
| <i>Hdac3</i>   | 1426437_s_at | 8.62E-05 | -2.4        | histone deacetylase 3                                                                   | regulation of mitotic cell cycle          |
| <i>Insr</i>    | 1450225_at   | 9.74E-05 | -8.0        | insulin receptor                                                                        | positive regulation of cell cycle process |
| <i>Lats2</i>   | 1419678_at   | 0.000769 | 3.4         | large tumor suppressor 2                                                                | G1/S transition of mitotic cell cycle     |
| <i>Mlf1</i>    | 1418589_a_at | 4.19E-05 | -18.2       | myeloid leukemia factor 1                                                               | cell cycle arrest                         |
| <i>Mtus1</i>   | 1454824_s_at | 3.27E-06 | -25.8       | mitochondrial tumor suppressor 1                                                        | cell cycle                                |

|               |              |          |       |                                                       |                                           |
|---------------|--------------|----------|-------|-------------------------------------------------------|-------------------------------------------|
| <i>Myc</i>    | 1424942_a_at | 5.99E-07 | 32.3  | myelocytomatosis oncogene                             | regulation of mitotic cell cycle          |
| <i>Myocd</i>  | 1425978_at   | 0.000295 | -15.0 | myocardin                                             | regulation of cell cycle                  |
| <i>Ncor1</i>  | 1423200_at   | 0.000654 | -3.8  | nuclear receptor co-repressor 1                       | cell cycle process                        |
| <i>Npm1</i>   | 1415839_a_at | 0.000259 | 3.8   | nucleophosmin 1                                       | positive regulation of cell cycle process |
| <i>Nsun2</i>  | 1423850_at   | 0.000409 | 5.5   | NOL1/NOP2/Sun domain family member 2                  | cell cycle                                |
| <i>Pbx1</i>   | 1428647_at   | 0.000738 | -6.4  | pre B-cell leukemia transcription factor 1            | positive regulation of cell cycle process |
| <i>Pdpm</i>   | 1419309_at   | 0.000755 | 23.5  | podoplanin                                            | regulation of mitotic cell cycle          |
| <i>Prox1</i>  | 1437894_at   | 0.000812 | -10.1 | prospero-related homeobox 1                           | positive regulation of cell cycle process |
| <i>Rblcc1</i> | 1418968_at   | 7.59E-05 | -10.6 | RB1-inducible coiled-coil 1                           | cell cycle                                |
| <i>Rgs2</i>   | 1419248_at   | 6.10E-05 | -22.9 | regulator of G-protein signaling 2                    | cell cycle                                |
| <i>Sox4</i>   | 1455867_at   | 0.000208 | 3.8   | SRY-box containing gene 4                             | positive regulation of cell cycle process |
| <i>Spast</i>  | 1460400_at   | 6.44E-05 | -5.1  | spastin                                               | cell cycle                                |
| <i>Sphk1</i>  | 1451596_a_at | 0.000519 | 4.5   | sphingosine kinase 1                                  | regulation of mitotic cell cycle          |
| <i>Tacc2</i>  | 1425745_a_at | 1.98E-05 | -6.2  | transforming, acidic coiled-coil containing protein 2 | cell cycle process                        |
| <i>Taok1</i>  | 1455432_at   | 0.0006   | -8.3  | TAO kinase 1                                          | cell cycle checkpoint                     |
| <i>Thbs1</i>  | 1421811_at   | 0.000438 | 74.8  | thrombospondin 1                                      | cell cycle arrest                         |
| <i>Tubb5</i>  | 1416256_a_at | 0.000537 | 15.7  | tubulin, beta 5                                       | cell cycle process                        |
| <i>Txnip</i>  | 1415996_at   | 0.000187 | -5.2  | thioredoxin interacting protein                       | cell cycle                                |
| <i>Usp9x</i>  | 1450038_s_at | 0.000153 | -19.9 | ubiquitin specific peptidase 9, X chromosome          | cell cycle                                |

**Supplementary Table S3. Cell proliferation-related genes passed GOEA.** For genes with multiple probe sets, the data of maximal Fold Changes (mCPC vs Ctl) are listed. All genes are in “cell proliferation” on GO function catalogue.

| Gene Symbol                                                   | Probeset ID  | p-value  | Fold-Change | Gene Title                                                                              | GO Function                               |
|---------------------------------------------------------------|--------------|----------|-------------|-----------------------------------------------------------------------------------------|-------------------------------------------|
| <i>Adk</i>                                                    | 1416319_at   | 0.00039  | -11.4       | adenosine kinase                                                                        | positive regulation of cell proliferation |
| <i>Anxa1</i>                                                  | 1448213_at   | 2.86E-05 | 47.7        | annexin A1                                                                              | regulation of cell proliferation          |
| <i>Appl2</i>                                                  | 1426743_at   | 3.12E-05 | -6.4        | adaptor protein, phosphotyrosine interaction, PH domain and leucine zipper containing 2 | cell proliferation                        |
| <i>Asph</i>                                                   | 1425274_at   | 0.00056  | -7.5        | aspartate-beta-hydroxylase                                                              | negative regulation of cell proliferation |
| <i>Bche</i>                                                   | 1421218_at   | 0.00039  | -9.5        | butyrylcholinesterase                                                                   | negative regulation of cell proliferation |
| <i>Cd81</i>                                                   | 1416330_at   | 0.0002   | -2.8        | CD81 antigen                                                                            | positive regulation of cell proliferation |
| <i>Cdkn1a</i>                                                 | 1424638_at   | 3.29E-06 | 28.6        | cyclin-dependent kinase inhibitor 1A (P21)                                              | negative regulation of cell proliferation |
| <i>Cdkn1b</i>                                                 | 1434045_at   | 0.00071  | -3.0        | cyclin-dependent kinase inhibitor 1B                                                    | negative regulation of cell proliferation |
| <i>Csf1</i>                                                   | 1460220_a_at | 0.00035  | 16.8        | colony stimulating factor 1 (macrophage)                                                | positive regulation of cell proliferation |
| <i>Dfna5</i>                                                  | 1421534_at   | 0.0002   | -7.3        | deafness, autosomal dominant 5 (human)                                                  | negative regulation of cell proliferation |
| <i>Entpd5</i>                                                 | 1417382_at   | 1.28E-06 | -41.8       | ectonucleoside triphosphate diphosphohydrolase 5                                        | cell proliferation                        |
| <i>Ereg</i>                                                   | 1419431_at   | 4.90E-05 | 37.7        | epiregulin                                                                              | negative regulation of cell proliferation |
| <i>Esr1</i>                                                   | 1421244_at   | 0.00018  | -75.3       | estrogen receptor 1 (alpha)                                                             | positive regulation of cell proliferation |
| <i>Fabp4</i>                                                  | 1451263_a_at | 0.00084  | -30.6       | fatty acid binding protein 4, adipocyte                                                 | positive regulation of cell proliferation |
| <i>Fgf1</i>                                                   | 1450869_at   | 0.00081  | -9.2        | fibroblast growth factor 1                                                              | positive regulation of cell proliferation |
| <i>Fgf13</i>                                                  | 1418497_at   | 0.00012  | -12.7       | fibroblast growth factor 13                                                             | cell proliferation                        |
| <i>Fosl1</i>                                                  | 1417487_at   | 1.84E-05 | 39.4        | fos-like antigen 1                                                                      | negative regulation of cell proliferation |
| <i>Foxo3</i>                                                  | 1434832_at   | 0.00014  | -9.3        | forkhead box O3                                                                         | regulation of cell proliferation          |
| <i>Gm13654 ///<br/>Gm16409 ///<br/>LOC639593 ///<br/>Rps6</i> | 1437246_x_at | 0.00055  | 2.6         | predicted gene 13654 /// ribosomal protein S6 pseudogene /// 40S ribosomal protein S6-l | cell proliferation                        |
| <i>Gpam</i>                                                   | 1419499_at   | 5.46E-05 | -28.4       | glycerol-3-phosphate acyltransferase, mitochondrial                                     | positive regulation of cell proliferation |
| <i>Hipk2</i>                                                  | 1428433_at   | 2.38E-06 | -66.3       | homeodomain interacting protein kinase 2                                                | positive regulation of cell proliferation |
| <i>Hmox1</i>                                                  | 1448239_at   | 0.00074  | 23.3        | heme oxygenase (decycling) 1                                                            | negative regulation of cell proliferation |



|                 |              |          |       |                                                                              |                                                                       |
|-----------------|--------------|----------|-------|------------------------------------------------------------------------------|-----------------------------------------------------------------------|
| <i>Igfbp5</i>   | 1422313_a_at | 0.00014  | -7.0  | insulin-like growth factor binding protein 5                                 | negative regulation of cell proliferation                             |
| <i>Insr</i>     | 1450225_at   | 9.74E-05 | -8.0  | insulin receptor                                                             | positive regulation of cell proliferation                             |
| <i>Mef2c</i>    | 1421027_a_at | 0.00036  | -19.9 | myocyte enhancer factor 2C                                                   | negative regulation of cell proliferation                             |
| <i>Mitf</i>     | 1455214_at   | 0.00018  | -8.9  | microphthalmia-associated transcription factor                               | regulation of cell proliferation                                      |
| <i>Mtss1</i>    | 1434036_at   | 0.00048  | -3.5  | metastasis suppressor 1                                                      | negative regulation of cell proliferation                             |
| <i>Myc</i>      | 1424942_a_at | 5.99E-07 | 32.3  | myelocytomatosis oncogene                                                    | positive regulation of metanephric cap mesenchymal cell proliferation |
| <i>Myocd</i>    | 1425978_at   | 0.00029  | -15.0 | myocardin                                                                    | negative regulation of cell proliferation                             |
| <i>Nampt</i>    | 1448607_at   | 7.39E-06 | -20.3 | nicotinamide phosphoribosyltransferase                                       | positive regulation of cell proliferation                             |
| <i>Ncor1</i>    | 1423200_at   | 0.00065  | -3.8  | nuclear receptor co-repressor 1                                              | positive regulation of cell proliferation                             |
| <i>Ndrg2</i>    | 1448154_at   | 0.00034  | -51.0 | N-myc downstream regulated gene 2                                            | negative regulation of cell proliferation                             |
| <i>Ndufaf4</i>  | 1435333_at   | 0.00039  | -10.4 | NADH dehydrogenase (ubiquinone) 1 alpha subcomplex, assembly factor 4        | positive regulation of cell proliferation                             |
| <i>Npm1</i>     | 1415839_a_at | 0.00026  | 3.8   | nucleophosmin 1                                                              | negative regulation of cell proliferation                             |
| <i>Pbx1</i>     | 1428647_at   | 0.00074  | -6.4  | pre B-cell leukemia transcription factor 1                                   | positive regulation of cell proliferation                             |
| <i>Pdk1</i>     | 1423747_a_at | 0.00016  | -31.8 | pyruvate dehydrogenase kinase, isoenzyme 1                                   | cell proliferation                                                    |
| <i>Pdpn</i>     | 1419309_at   | 0.00076  | 23.5  | podoplanin                                                                   | cell proliferation                                                    |
| <i>Pik3r1</i>   | 1425515_at   | 8.26E-05 | -15.4 | phosphatidylinositol 3-kinase, regulatory subunit, polypeptide 1 (p85 alpha) | negative regulation of cell proliferation                             |
| <i>Pmaip1</i>   | 1418203_at   | 0.00032  | 49.0  | phorbol-12-myristate-13-acetate-induced protein 1                            | negative regulation of cell proliferation                             |
| <i>Ppargc1a</i> | 1434099_at   | 0.0006   | -22.6 | peroxisome proliferative activated receptor, gamma, coactivator 1 alpha      | positive regulation of cell proliferation                             |
| <i>Prox1</i>    | 1437894_at   | 0.00081  | -10.1 | prospero-related homeobox 1                                                  | negative regulation of cell proliferation                             |
| <i>Rnf139</i>   | 1429425_at   | 0.00024  | -22.2 | ring finger protein 139                                                      | negative regulation of cell proliferation                             |
| <i>Rora</i>     | 1436325_at   | 7.41E-05 | -3.1  | RAR-related orphan receptor alpha                                            | cell proliferation                                                    |
| <i>Serpine1</i> | 1419149_at   | 0.00072  | 11.3  | serine (or cysteine) peptidase inhibitor, clade E, member 1                  | positive regulation of cell proliferation                             |
| <i>Sod2</i>     | 1417194_at   | 1.31E-05 | -5.5  | superoxide dismutase 2, mitochondrial                                        | negative regulation of cell proliferation                             |
| <i>Sox4</i>     | 1455867_at   | 0.00021  | 3.8   | SRY-box containing gene 4                                                    | negative regulation of cell proliferation                             |
| <i>Sphk1</i>    | 1451596_a_at | 0.00052  | 4.5   | sphingosine kinase 1                                                         | positive regulation of cell proliferation                             |
| <i>Suz12</i>    | 1452364_at   | 0.00058  | -2.7  | suppressor of zeste 12 homolog (Drosophila)                                  | positive regulation of cell proliferation                             |

|               |              |          |      |                                                              |                                           |
|---------------|--------------|----------|------|--------------------------------------------------------------|-------------------------------------------|
| <i>Tacc2</i>  | 1425745_a_at | 1.98E-05 | -6.2 | transforming, acidic coiled-coil containing protein 2        | cell proliferation                        |
| <i>Tgfb2</i>  | 1450922_a_at | 0.01348  | 6.0  | transforming growth factor, beta 2                           | cell proliferation                        |
| <i>Tgfr3</i>  | 1433795_at   | 0.00012  | -5.0 | transforming growth factor, beta receptor III                | negative regulation of cell proliferation |
| <i>Thbs1</i>  | 1421811_at   | 0.00044  | 74.8 | thrombospondin 1                                             | negative regulation of cell proliferation |
| <i>Tial1</i>  | 1452821_at   | 6.03E-05 | -6.1 | Tia1 cytotoxic granule-associated RNA binding protein-like 1 | positive regulation of cell proliferation |
| <i>Txnip</i>  | 1415996_at   | 0.00019  | -5.2 | thioredoxin interacting protein                              | regulation of cell proliferation          |
| <i>Yme1l1</i> | 1450954_at   | 0.00071  | -7.2 | YME1-like 1 ( <i>S. cerevisiae</i> )                         | cell proliferation                        |
| <i>Zeb1</i>   | 1418926_at   | 0.00074  | -9.1 | zinc finger E-box binding homeobox 1                         | negative regulation of cell proliferation |

**Supplementary Table S4. Stem cell related genes passed GOEA.** Note: For genes with multiple probe sets, the data of maximal Fold Changes (mCPC vs Ctl) are listed.

| <b>Gene Symbol</b> | <b>Probeset ID</b> | <b>p-value</b> | <b>Fold-Change</b> | <b>Gene Title</b>                                            | <b>GO Function</b>                      |
|--------------------|--------------------|----------------|--------------------|--------------------------------------------------------------|-----------------------------------------|
| <i>Bche</i>        | 1421218_at         | 0.00039        | -9.5               | butyrylcholinesterase                                        | stem cell differentiation               |
| <i>Col1a1</i>      | 1423669_at         | 2.67E-05       | 10.1               | collagen, type I, alpha 1                                    | regulation of stem cell differentiation |
| <i>Cul3</i>        | 1434717_at         | 0.000267       | -5.3               | cullin 3                                                     | stem cell division                      |
| <i>Hook3</i>       | 1435157_at         | 0.000148       | -4.7               | hook homolog 3 (Drosophila)                                  | neuronal stem cell maintenance          |
| <i>Mef2c</i>       | 1421027_a_at       | 0.000361       | -19.9              | myocyte enhancer factor 2C                                   | stem cell differentiation               |
| <i>Msi2</i>        | 1435520_at         | 1.78E-05       | -21.8              | Musashi homolog 2 (Drosophila)                               | stem cell development                   |
| <i>Mtf2</i>        | 1418515_at         | 0.00017        | -3.2               | metal response element binding transcription factor 2        | stem cell differentiation               |
| <i>Myc</i>         | 1424942_a_at       | 5.99E-07       | 32.3               | myelocytomatosis oncogene                                    | regulation of stem cell proliferation   |
| <i>Pcm1</i>        | 1449120_a_at       | 0.000723       | -2.8               | pericentriolar material 1                                    | neuronal stem cell maintenance          |
| <i>Prox1</i>       | 1437894_at         | 0.000812       | -10.1              | prospero-related homeobox 1                                  | neuronal stem cell maintenance          |
| <i>Sox4</i>        | 1455867_at         | 0.000208       | 3.8                | SRY-box containing gene 4                                    | somatic stem cell maintenance           |
| <i>Tgfb2</i>       | 1450922_a_at       | 0.0134806      | 6.0                | Transforming growth factor, beta 2                           | Somatic stem cell division              |
| <i>Tgfb3</i>       | 1433795_at         | 0.000121       | -5.0               | transforming growth factor, beta receptor III                | regulation of stem cell differentiation |
| <i>Tial1</i>       | 1452821_at         | 6.03E-05       | -6.1               | Tia1 cytotoxic granule-associated RNA binding protein-like 1 | stem cell division                      |
| <i>Zeb1</i>        | 1418926_at         | 0.000742       | -9.1               | zinc finger E-box binding homeobox 1                         | regulation of stem cell proliferation   |

## Supplementary Figures

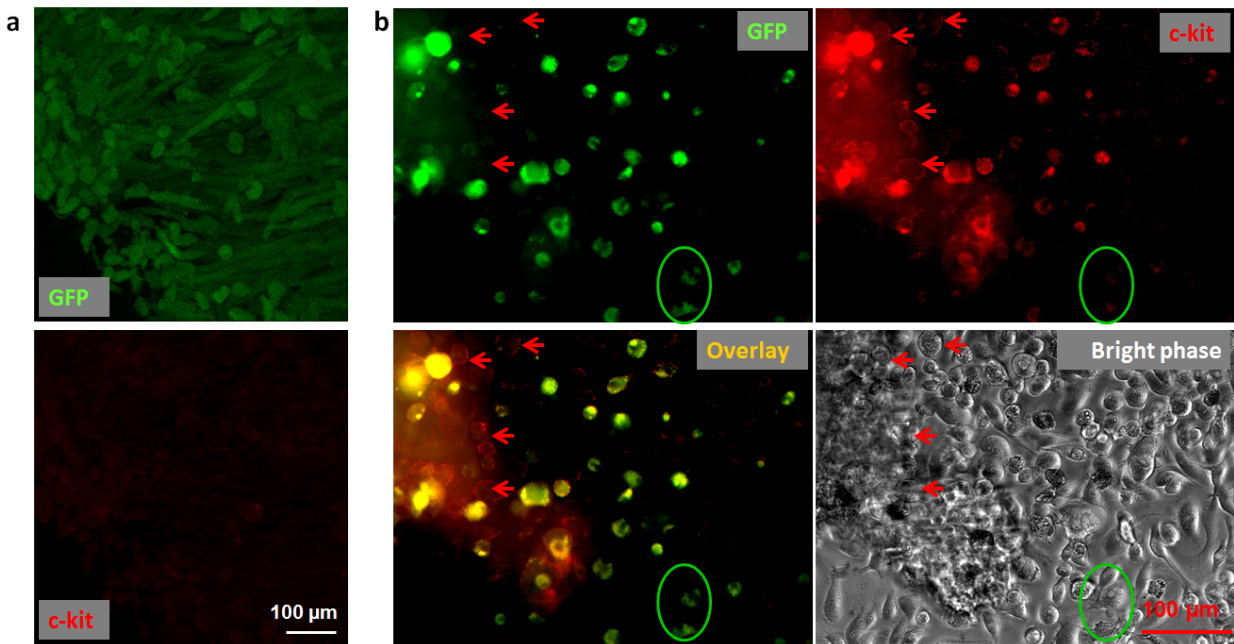

**Supplementary Figure S1. Fluorescent immunocytochemistry of cardiac explant culture.** (a) Cardiac explant culture at the first day of plating, showing GFP<sup>+</sup> cardiomyocytes in rod shape and some started to round up, with no visible c-kit signal when detected by antibody. (b) Cardiac explant culture at 2 weeks, showing the coexpression of GFP (green) and c-kit (red) in myocyte-derived progenitor cells. Red arrows indicates the resident c-kit<sup>+</sup> cells that do not expressing GFP, and the green circle indicates the GFP<sup>+</sup>-myocyte progeny that have no or very low expression of c-kit. Scale bars= 100 μm.

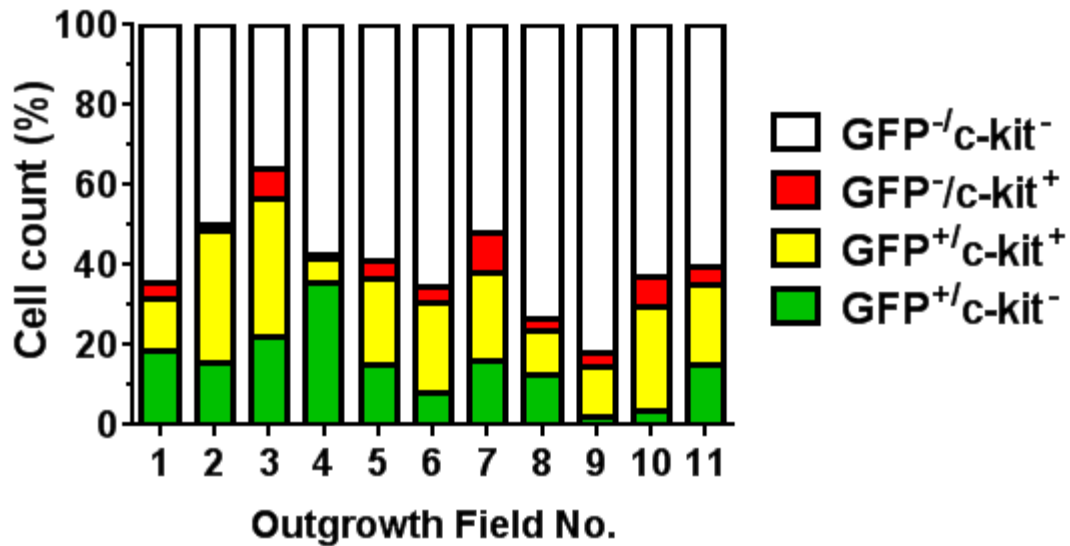

**Supplementary Figure S2. The expression of GFP and c-kit in outgrowth of cardiac explant.** Shown is the percentage of the cells without or with GFP and/or c-kit expression in measured remote fields 2 weeks after cardiac explant culture (N=2 hearts). There were 60.3%±3.7% cells in GFP<sup>-</sup>/c-kit<sup>-</sup>, 4.5%±2.6% in GFP<sup>-</sup>/c-kit<sup>+</sup>, 20.3%±9.0% in GFP<sup>+</sup>/c-kit<sup>+</sup>, and 14.8%±9.2% in GFP<sup>+</sup>/c-kit<sup>-</sup>.

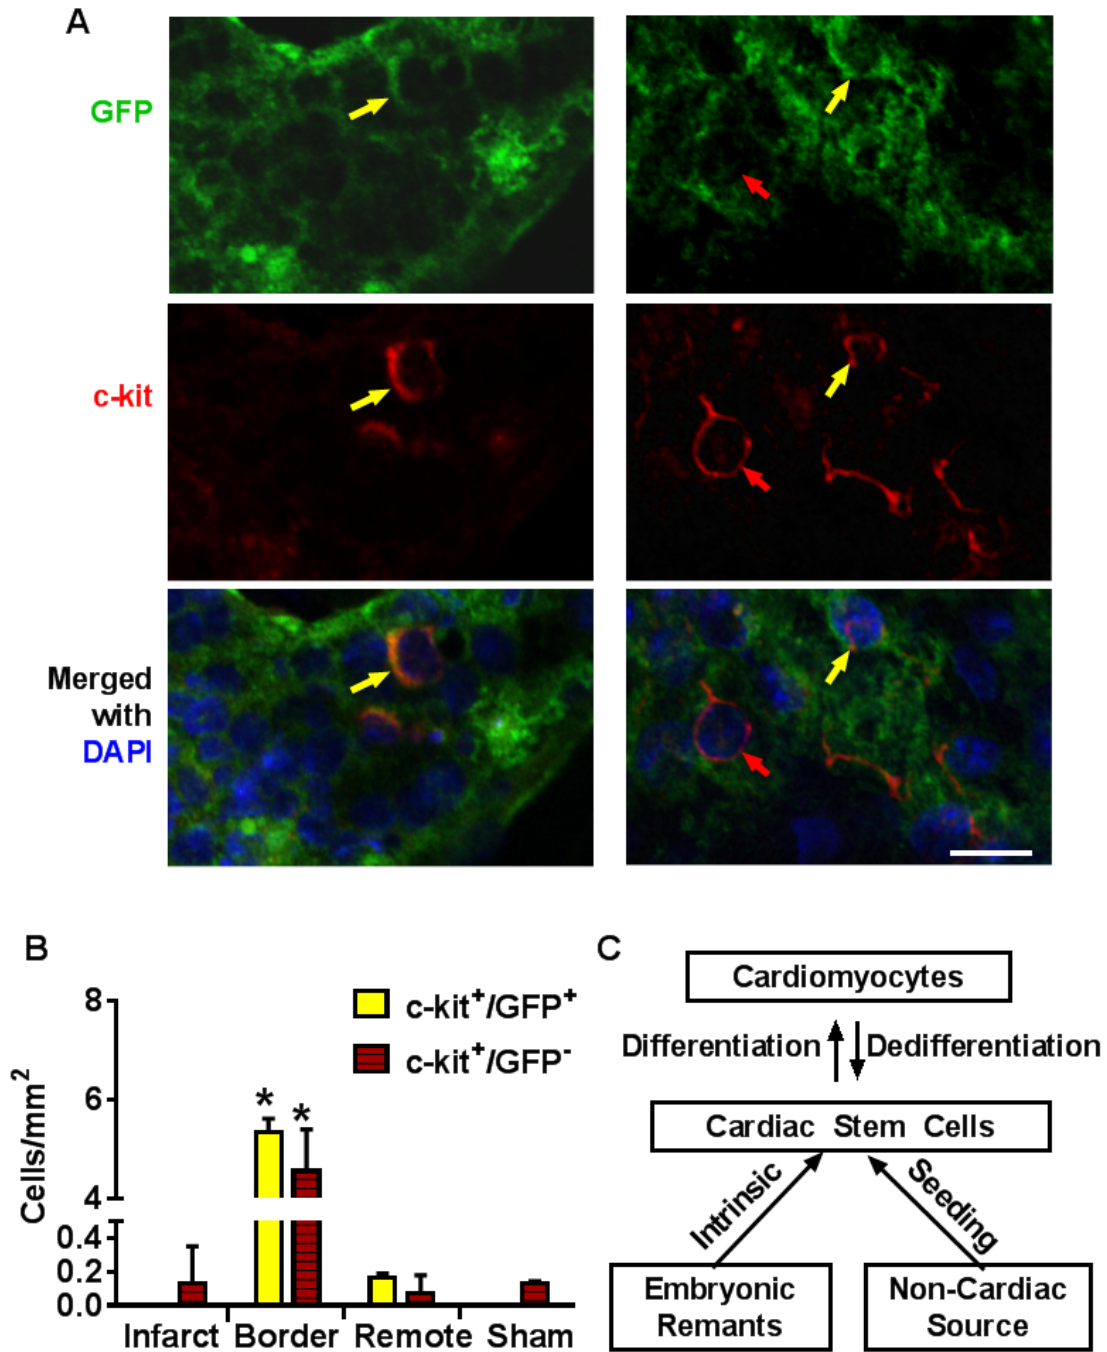

**Supplementary Figure S3. Dedifferentiation of cardiomyocytes *in vivo*.** Adult MerCreMer-Z/EG bitransgenic mice treated with 4-OH-tamoxifen were subjected to LAD ligation to create infarction. (a) Immunohistochemistry showing the c-kit<sup>+</sup> (red) cells with (yellow arrow) or without (red arrows) the expression of GFP (green) in the infarct border zone. Scale bar, 10  $\mu$ m. (b) Regional difference in the frequency of cells expressing c-kit and/or GFP. \* $p < 0.05$  vs.

infarct or remote area. (c) Paradigms for cardiac regeneration. Cardiomyocytes and other heart cells can be developed and differentiated from cardiac progenitor/stem cells of either intrinsic embryonic remnants or those seeded from non-cardiac sources. Heart cells can also dedifferentiate and become plastic to contribute to the cardiac progenitor cell pools, such that the cellular dynamics is maintained.

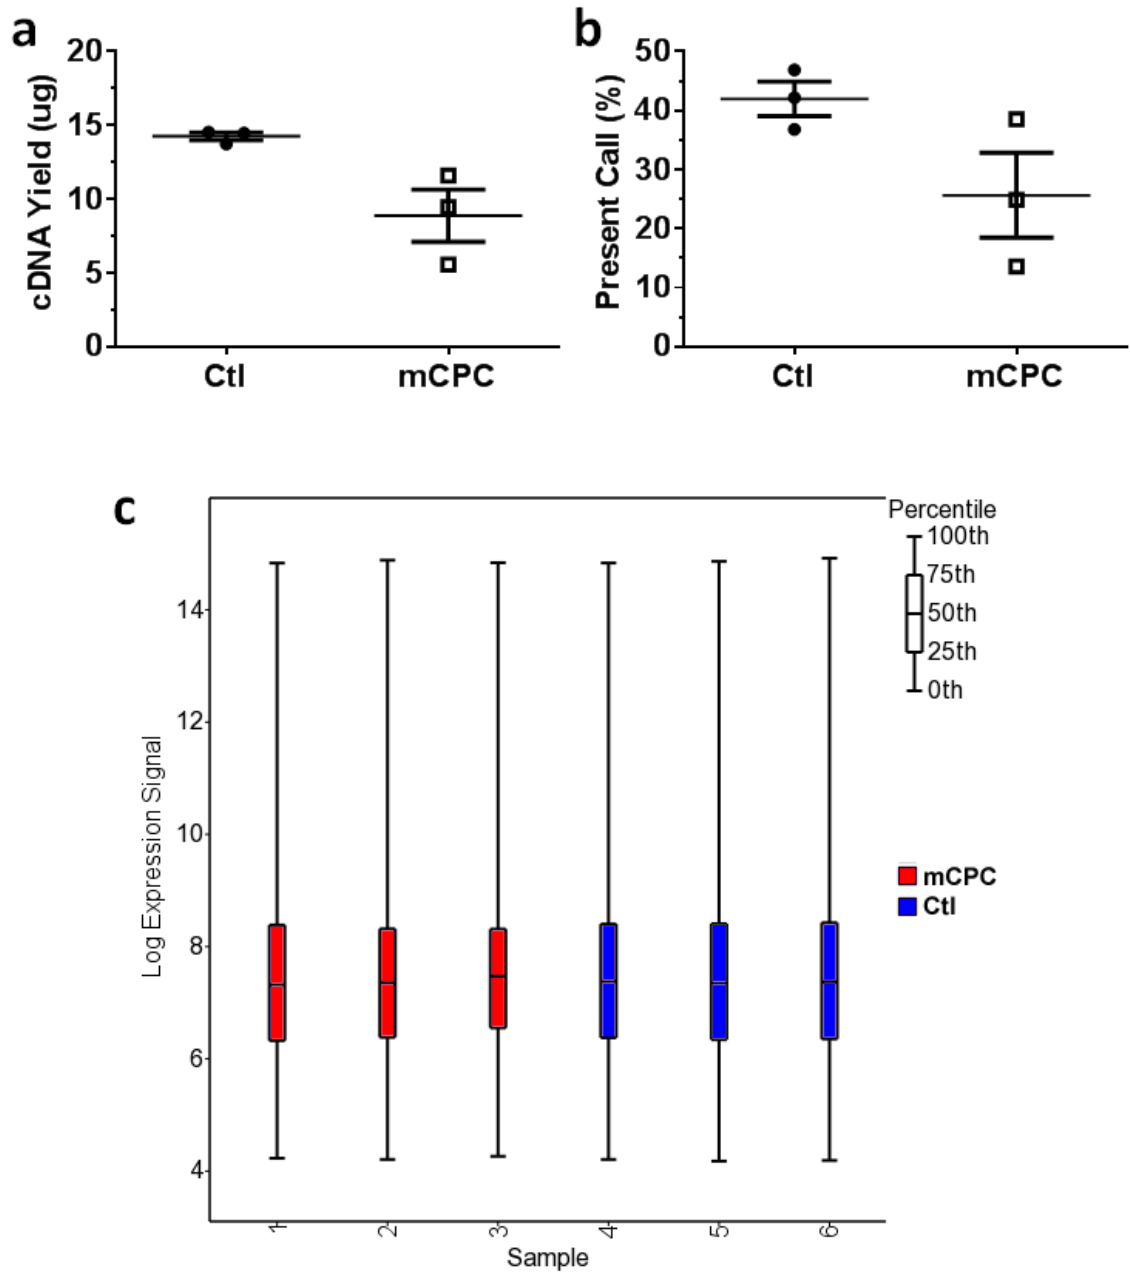

**Supplementary Figure S4. Quality control on single-cell microarray processes. (a)** cDNA yields from single cardiomyocytes (Ctl) and myocytes-derived progenitor cells (mCPC). **(b)** Present call of probe sets in the microarray. N=3 single cells for each group. **(c)** Box plot on Log expression signal.



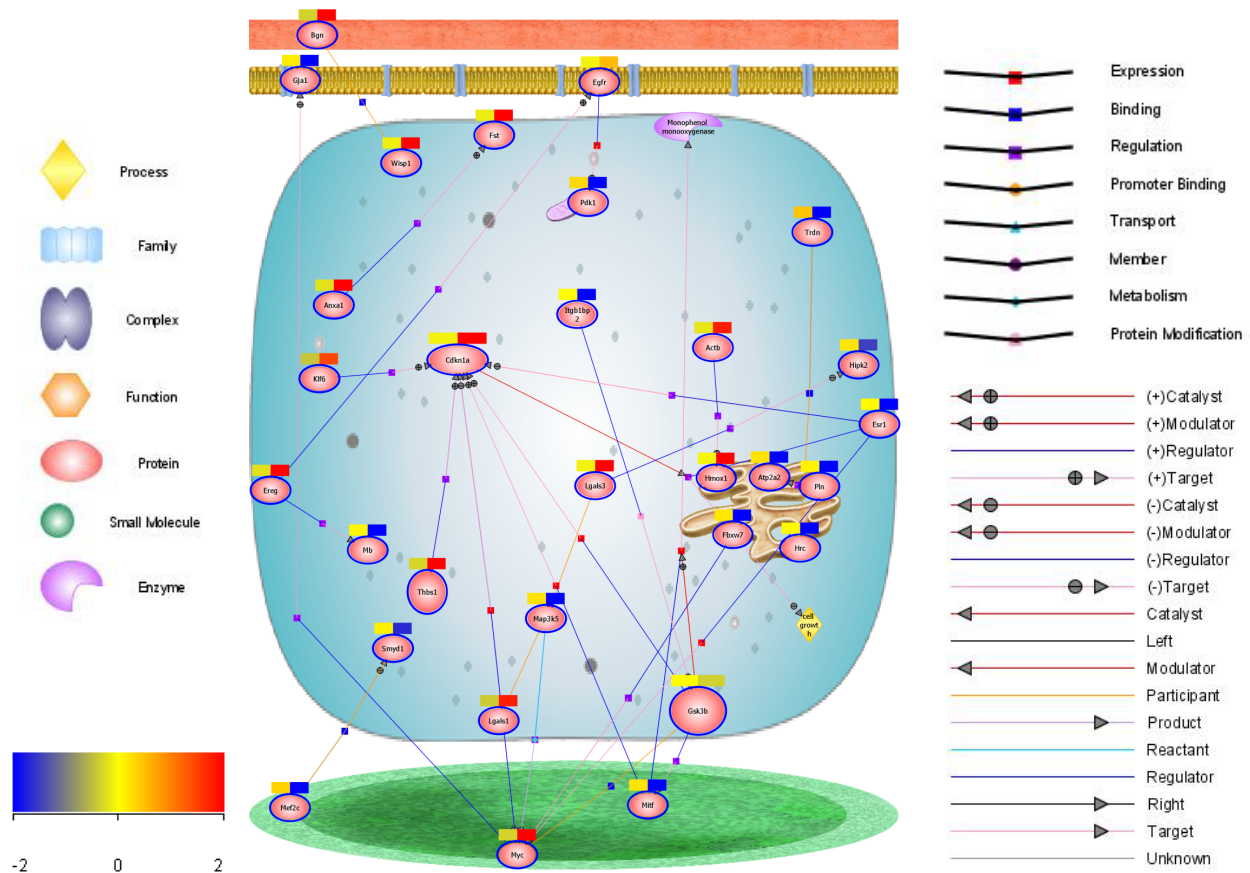

**Supplemental Figure S5. Pathway analysis based on differentially expressed genes (DEGs).** Significant genes (DEGs) were applied into Pathway Analysis module using Genespring GX 11 (Agilent). Algorithm of Direct interactions on all relation types with a relation score  $\geq 9$  was included for analysis. As shown in the cellular view, among the 41 relations, there were 3 hubs Gsk3b, Cdkn1a (p21), and Myc which played central roles in cell fate change of cardiomyocyte (Ctl) into myocyte-derived cardiac progenitors cells (mCPCs). Color bars over the genes indicate the expression levels in Ctl (left bar) and mCPCs (right bar).

### Venn Diagram (DMGs)

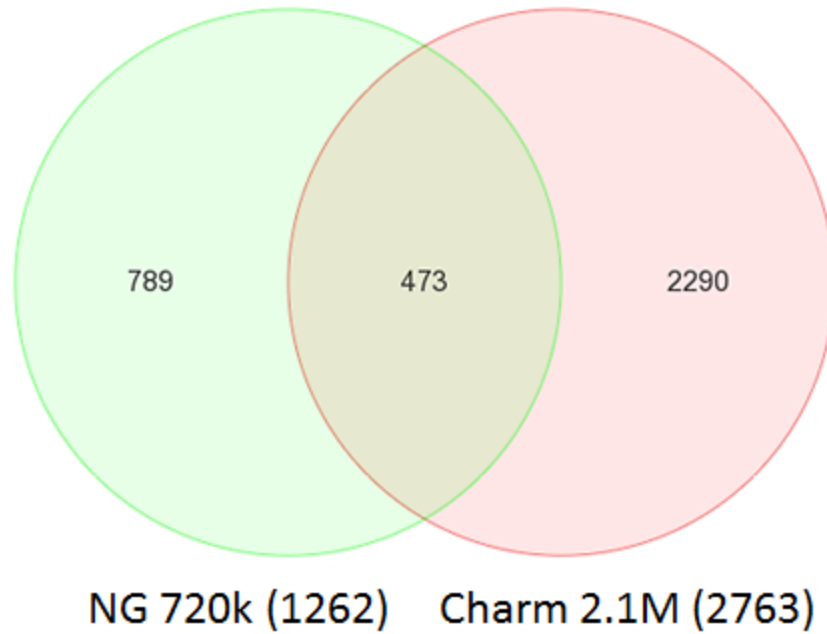

**Supplemental Figure S6.** Venn diagram of the differentially-methylated genes (DMGs) corresponded to differentially-methylated regions when comparing mCPCs with adult myocyte. DNA methylation was detected by the NimbleGen 720k array and the CHARM customer design 2.1M array.

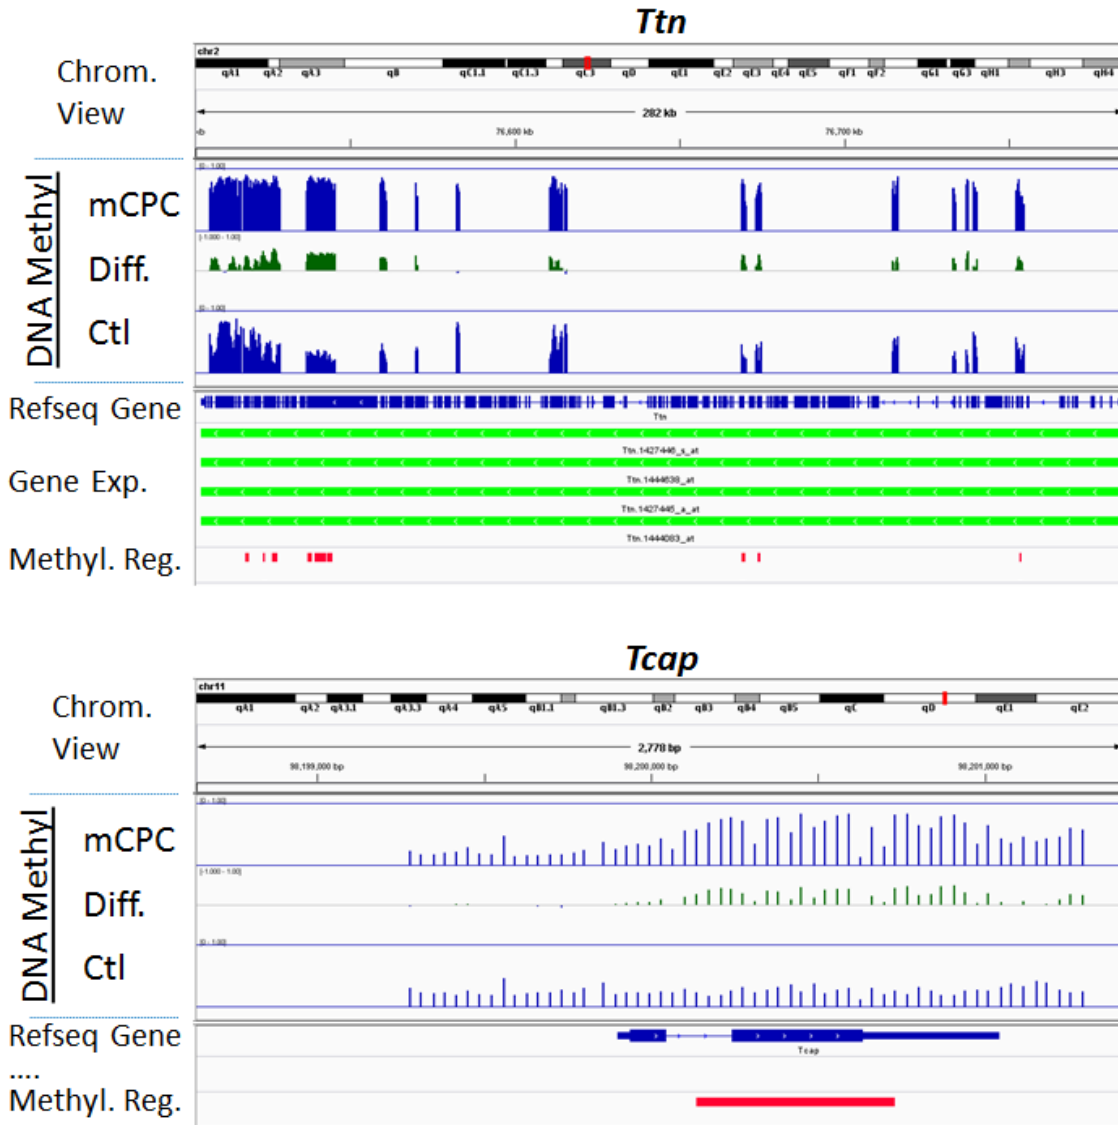

**Supplementary Figure S7: Potential epigenetic regulation of Titin (*ttn*) and Titin-cap (*Tcap*).** DNA methylation and gene expression array data is visualized with IGV on Titin (*Ttn*, top panel) and Titin-cap gene (*Tcap*, bottom panel) showing the hypermethylation of the *Ttn* and *Tcap* gene body. For both panels, top portion shows the chromosomal region flanking *Tcap* gene. The middle bar graphs present the DNA methylation levels (scale 0-1.0) assayed by CHARM customer array in mCPCs and control myocytes as well the differential methylation level (Diff.) comparing mCPC to Ctl. The bottom portion shows the Refseq gene structures and the differentially-methylated region in mCPCs vs myocytes. *Tcap* gene was down-regulated (-6.6 fold) in mCPCs compared to control (Ctl) myocytes, with  $p=0.054098$  so not shown in the transcription level (fold-change) section. Gene expression array data has been converted to match same genome built (mm8) as CHARM array.

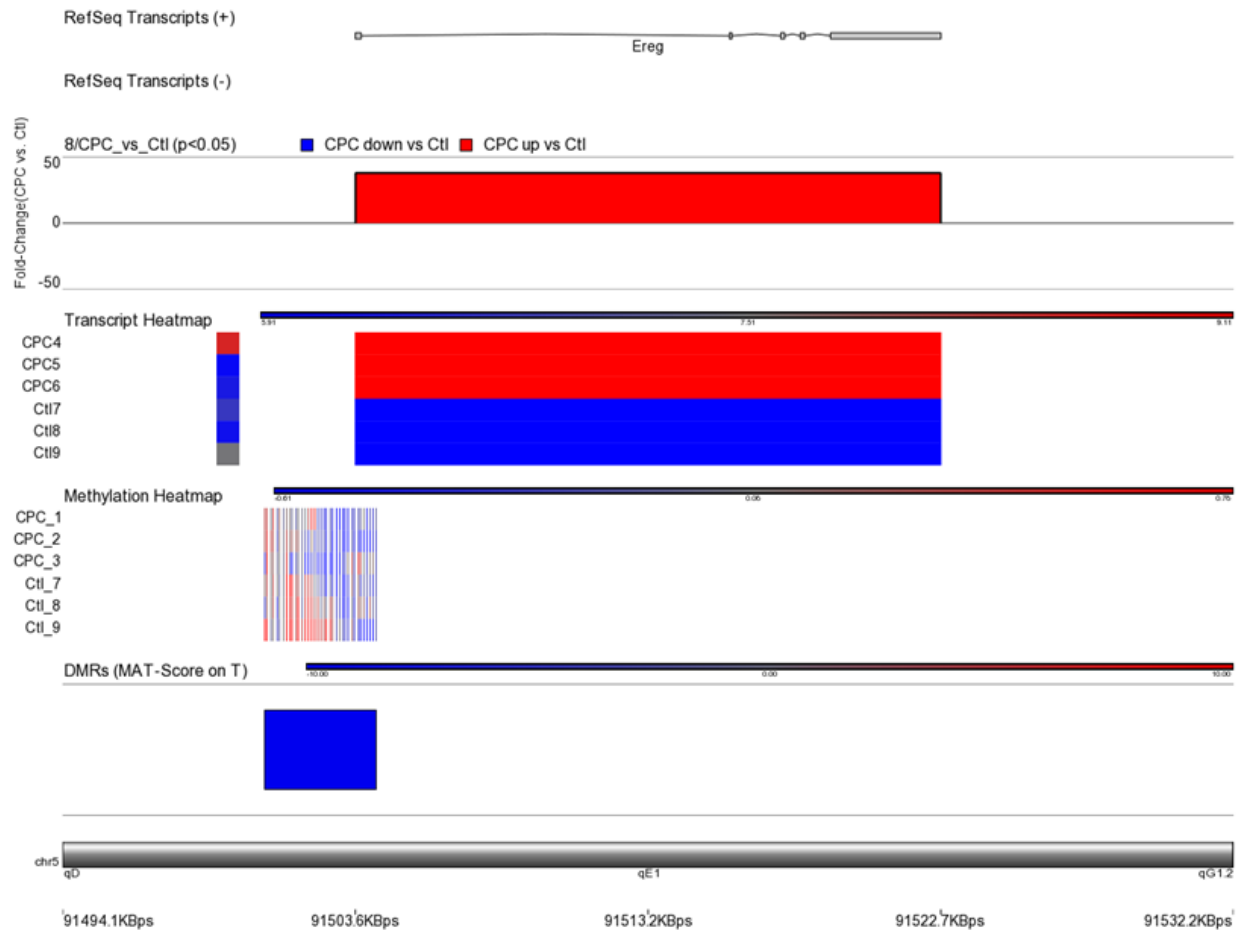

**Supplementary Figure S8: Potential epigenetic regulation of Epieregulin (*Ereg*).** Genomic view of *Ereg* which is up-regulated in CPCs compared to control myocytes but the promoter regions being methylated. The top line shows the gene structure and *ereg* is on the plus strand. The 2<sup>nd</sup> and 3<sup>rd</sup> lines: fold changes and transcript heatmap of CPCs vs myocytes detected by Affymetrix Genechip gene expression array. The 4<sup>th</sup> and 5<sup>th</sup> lines: DNA methylation heatmap, and DMR based on MAT-score on T detected by Roche 3x720k DNA methylation array. The bottom panel: genome location.

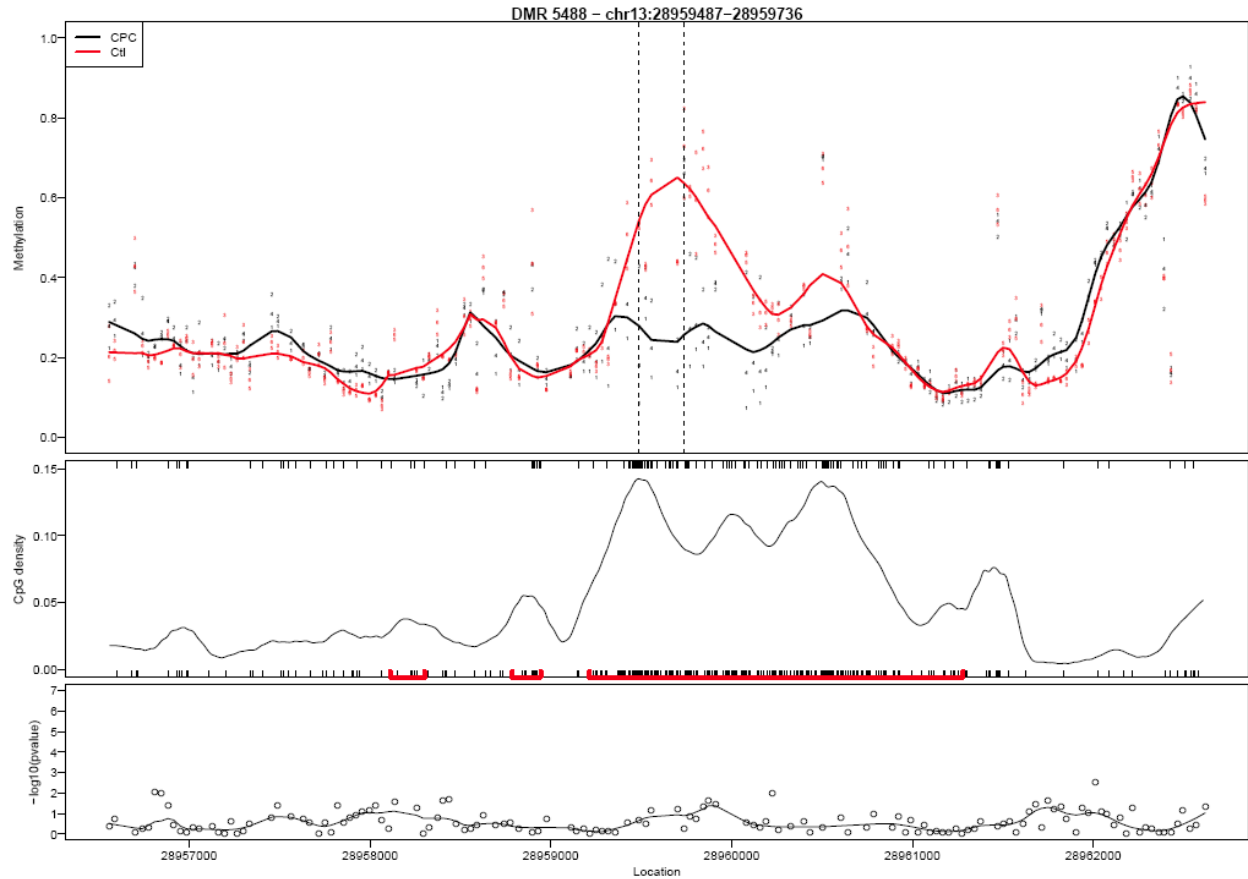

**Supplementary Figure S9. Epigenetic Regulation of *Sox4*.** The upper panel shows the methylation level (1.0=100%) of adult cardiomyocytes (Ctl, red) and their derived cardiac progenitor cells (mCPCs, black). The vertical dash lines define the edges of the DMR. The middle panel shows the CpG density; with the red brackets represent the CpG islands. Lower panel shows the chromosome locations and differential methylation p values for probes.

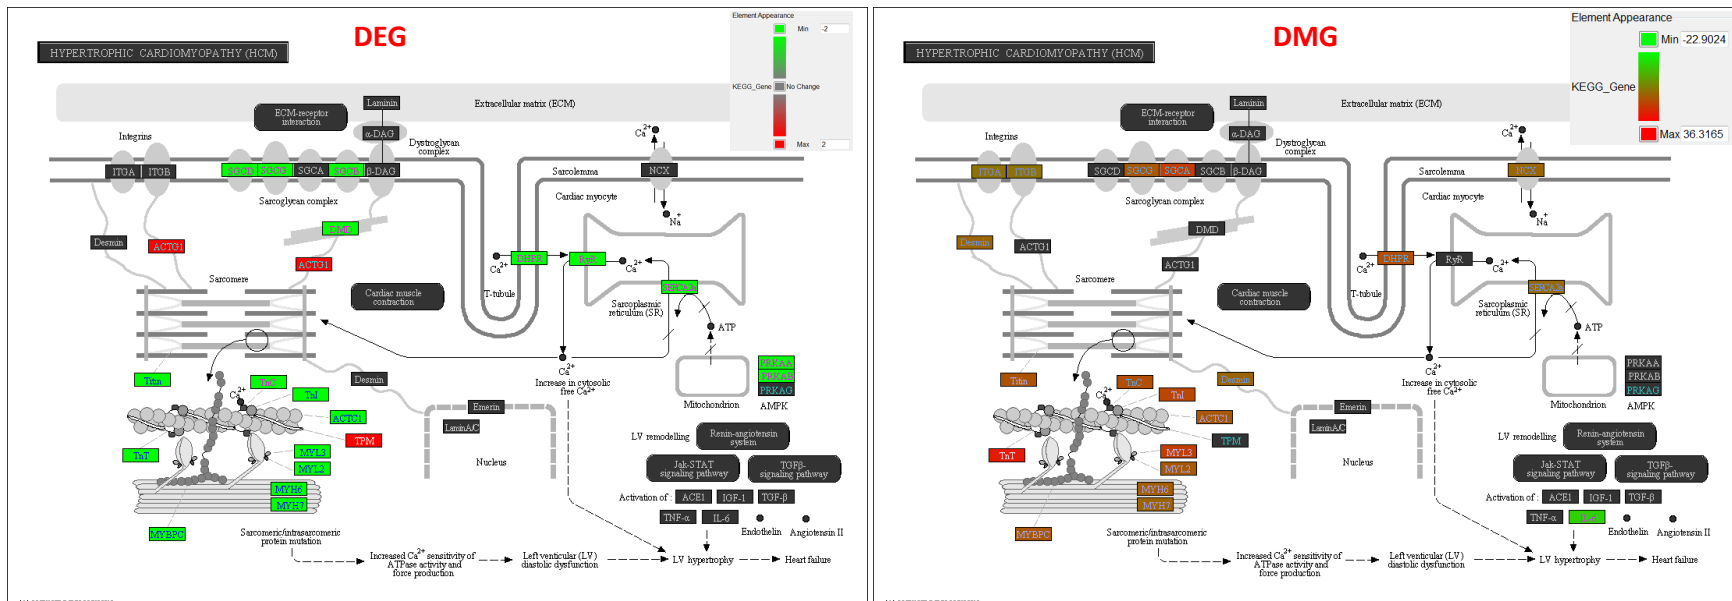

**Supplementary Figure S10. Integrated pathway enrichment analysis based on differentially expressed genes (DEGs) and differentially methylated genes (DMGs).** The “cardiac hypertrophy pathway” is enriched by the DEGs and DMGs based on KEGG knowledge database using the DEGs detected by Affymetrix GeneChIP and the DMGs detected by NimbleGen 720k DNA methylation array ( $p < 0.05$ ,  $|\text{MAT Score-on-T statics}| > 10$ ). The down-regulation of most genes in this pathway (left: green color shaded genes) in mCPCs vs adult myocytes is well orchestrated with their DNA hypermethylation (right; red to brown color shaded genes). The enrichment p value for hypertrophic cardiomyopathy pathway is  $2.2 \times 10^{-6}$  for gene expression and  $7.6 \times 10^{-7}$  for DNA methylation.

# INGENUITY<sup>®</sup>

## PATHWAY ANALYSIS

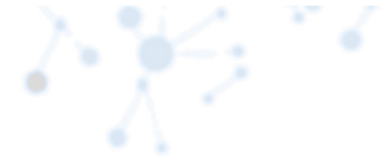

Analysis Name: MDC vs. Ctl FC2FDR05.txt [Passed]

Analysis Creation Date: 2014-09-26

Build version: 313398M

Content version: 18841524 (Release Date: 2014-06-24)

### Analysis settings

[View](#)

Reference set: Ingenuity Knowledge Base (Genes Only)

Relationship to include: Direct and Indirect

Does not Include Endogenous Chemicals

Optional Analyses: My Pathways My List

Filter Summary:

Consider only relationships where  
confidence = Experimentally Observed

Cutoff:

## Top Canonical Pathways

| Name                                   | p-value  | Ratio             |
|----------------------------------------|----------|-------------------|
| Calcium Signaling                      | 9.58E-07 | 18/178<br>(0.101) |
| Mitochondrial Dysfunction              | 1.04E-05 | 16/171<br>(0.094) |
| Epithelial Adherens Junction Signaling | 2.8E-05  | 14/146<br>(0.096) |
| Aryl Hydrocarbon Receptor Signaling    | 7.5E-05  | 13/140<br>(0.093) |
| Glycogen Degradation II                | 8.35E-05 | 4/10<br>(0.4)     |

## Top Upstream Regulators

| Upstream Regulator | p-value of overlap | Predicted Activation State |
|--------------------|--------------------|----------------------------|
| rosiglitazone      | 8.69E-21           | Inhibited                  |
| PPARGC1A           | 1.87E-20           | Inhibited                  |
| MEF2C              | 2.41E-19           | Inhibited                  |
| DMD                | 8.88E-17           |                            |
| D-glucose          | 1.48E-16           |                            |



## Top Diseases and Bio Functions

### Diseases and Disorders

| Name                                | p-value             | #<br>Molecules |
|-------------------------------------|---------------------|----------------|
| Cardiovascular Disease              | 5.71E-26 - 6.74E-04 | 138            |
| Organismal Injury and Abnormalities | 5.71E-26 - 6.74E-04 | 307            |
| Developmental Disorder              | 2.46E-19 - 6.74E-04 | 84             |
| Skeletal and Muscular Disorders     | 2.33E-16 - 6.74E-04 | 109            |
| Hereditary Disorder                 | 2.89E-15 - 6.74E-04 | 78             |

### Molecular and Cellular Functions

| Name                               | p-value             | #<br>Molecules |
|------------------------------------|---------------------|----------------|
| Cell Morphology                    | 2.97E-18 - 6.74E-04 | 129            |
| Cellular Development               | 3.67E-14 - 6.74E-04 | 171            |
| Cellular Growth and Proliferation  | 3.67E-14 - 5.41E-04 | 176            |
| Cellular Assembly and Organization | 6.17E-12 - 6.74E-04 | 121            |
| Cell Death and Survival            | 4.36E-11 - 6.34E-04 | 172            |

**Physiological System Development and Function**

| Name                                                  | p-value             | #<br>Molecules |
|-------------------------------------------------------|---------------------|----------------|
| Cardiovascular System Development and Function        | 6.00E-20 - 6.59E-04 | 143            |
| Organ Morphology                                      | 6.00E-20 - 5.76E-04 | 115            |
| Skeletal and Muscular System Development and Function | 2.97E-18 - 6.74E-04 | 126            |
| Tissue Morphology                                     | 2.97E-18 - 6.74E-04 | 92             |
| Embryonic Development                                 | 3.01E-17 - 4.86E-04 | 130            |

## Top Tox Functions

### Assays: Clinical Chemistry and Hematology

| Name                                     | p-value             | # Molecules |
|------------------------------------------|---------------------|-------------|
| Increased Levels of Hematocrit           | 9.48E-04 - 9.48E-04 | 9           |
| Increased Levels of Red Blood Cells      | 1.47E-02 - 1.47E-02 | 7           |
| Increased Levels of Albumin              | 5.13E-02 - 5.13E-02 | 1           |
| Increased Levels of Alkaline Phosphatase | 2.60E-01 - 2.60E-01 | 3           |
| Increased Levels of Creatinine           | 3.08E-01 - 3.08E-01 | 1           |

### Cardiotoxicity

| Name                        | p-value             | # Molecules |
|-----------------------------|---------------------|-------------|
| Cardiac Hypertrophy         | 2.46E-19 - 4.40E-01 | 48          |
| Cardiac Fibrosis            | 2.78E-11 - 7.59E-02 | 25          |
| Heart Failure               | 5.86E-08 - 5.92E-01 | 25          |
| Cardiac Arrhythmia          | 1.23E-07 - 4.82E-01 | 21          |
| Cardiac Necrosis/Cell Death | 2.81E-07 - 1.00E-01 | 25          |

**Hepatotoxicity**

| Name                                 | p-value             | #<br>Molecules |
|--------------------------------------|---------------------|----------------|
| Liver Steatosis                      | 7.73E-09 - 4.82E-01 | 27             |
| Liver Necrosis/Cell Death            | 2.75E-05 - 4.58E-02 | 19             |
| Liver Hyperplasia/Hyperproliferation | 3.89E-05 - 4.54E-01 | 63             |
| Liver Proliferation                  | 1.01E-04 - 3.78E-01 | 17             |
| Hepatocellular Carcinoma             | 8.64E-03 - 4.54E-01 | 21             |

**Nephrotoxicity**

| Name                      | p-value             | #<br>Molecules |
|---------------------------|---------------------|----------------|
| Renal Damage              | 5.12E-06 - 5.34E-01 | 15             |
| Renal Tubule Injury       | 5.12E-06 - 4.35E-02 | 15             |
| Kidney Failure            | 2.65E-03 - 3.65E-01 | 14             |
| Renal Necrosis/Cell Death | 1.02E-02 - 2.50E-01 | 23             |
| Renal Proliferation       | 1.30E-02 - 3.61E-01 | 10             |

**Top Regulator Effect Networks**

| ID | Regulators                                                   | Diseases & Functions                                     | Consistency Score |
|----|--------------------------------------------------------------|----------------------------------------------------------|-------------------|
| 1  | Calcineurin protein(s), FOXO3, GATA4, HAND2, MEF2A (+8 more) | congestive heart failure (+8 more)                       | 19.132            |
| 2  | ACOX1, ADIPOQ, FGF1, FST, IL13, PPARA, PPARGC1A (+1 more)    | hypoglycemia, quantity of carbohydrate (+1 more)         | 14.224            |
| 3  | ACOX1, Akt, DAG1, FGF21, INSR, KLF15, MAP4K4 (+10 more)      | damage of muscle, degeneration of heart (+5 more)        | 13.510            |
| 4  | Calcineurin protein(s), GATA4, IL1B, MEF2C, MYOCD (+3 more)  | congestive heart failure (+1 more)                       | 11.384            |
| 5  | Calcineurin protein(s), CD24, ESRRA, MEF2A, OXT              | congestive heart failure, epithelial neoplasia (+6 more) | 7.546             |

### Top Networks

| ID | Associated Network Functions                                              | Score |
|----|---------------------------------------------------------------------------|-------|
| 1  | Developmental Disorder, Hereditary Disorder, Metabolic Disease            | 60    |
| 2  | Energy Production, Nucleic Acid Metabolism, Small Molecule Biochemistry   | 46    |
| 3  | Cellular Compromise, Cellular Assembly and Organization, Cell Morphology  | 44    |
| 4  | RNA Post-Transcriptional Modification, Gene Expression, Protein Synthesis | 41    |
| 5  | Lipid Metabolism, Nucleic Acid Metabolism, Small Molecule Biochemistry    | 37    |

### Top Tox Lists

| Name                                            | p-value  | Ratio             |
|-------------------------------------------------|----------|-------------------|
| <a href="#">Cardiac Hypertrophy</a>             | 9.22E-20 | 48/381<br>(0.126) |
| <a href="#">Cardiac Fibrosis</a>                | 1.07E-11 | 25/182<br>(0.137) |
| <a href="#">Cardiac Necrosis/Cell Death</a>     | 2.81E-08 | 25/264<br>(0.095) |
| <a href="#">Acute Renal Failure Panel (Rat)</a> | 5.01E-07 | 11/62<br>(0.177)  |

Fatty Acid Metabolism

1.11E-05

13/117  
(0.111)

## Top My Lists

| Name | p-value | Ratio |
|------|---------|-------|
|------|---------|-------|

## Top My Pathways

| Name                                              | p-value  | Ratio          |
|---------------------------------------------------|----------|----------------|
| Network: Gene exp, C.Cycle, conn.Tissue DevNFunct | 9.43E-03 | 2/6<br>(0.333) |

## Top Molecules

## Fold Change up-regulated

| Molecules | Exp. Value | Exp. Chart |
|-----------|------------|------------|
| THBS1     | ↑74.844    |            |
| LOX       | ↑61.023    |            |
| Pmaip1    | ↑49.039    |            |
| S100A6    | ↑47.804    |            |
| CKS2      | ↑47.791    |            |
| ANXA1     | ↑47.699    |            |
| FOSL1     | ↑39.380    |            |
| EREG      | ↑37.666    |            |
| S100A4    | ↑37.495    |            |
| CXCL2     | ↑34.666    |            |

## Fold Change down-regulated

| Molecules | Exp. Value | Exp. Chart |
|-----------|------------|------------|
| DSP*      | ↓-172.140  |            |
| Pln*      | ↓-171.472  |            |
| MYH6*     | ↓-170.245  |            |
| SORBS2    | ↓-142.896  |            |
| TNNI3     | ↓-130.703  |            |
| CKMT2     | ↓-115.025  |            |
| ACTC1     | ↓-112.428  |            |
| MYL2      | ↓-107.130  |            |
| RYR2*     | ↓-106.879  |            |
| TNNT2*    | ↓-85.146   |            |
